# Supplementary material for: Genome-wide identification and comparative analysis of the heat shock transcription factor family in Chinese white pear (Pyrus bretschneideri) and five other Rosaceae species
Source: PubMed Central journal article supplement (PMC4310194; doi:10.1186/s12870-014-0401-5), 2015-01-21

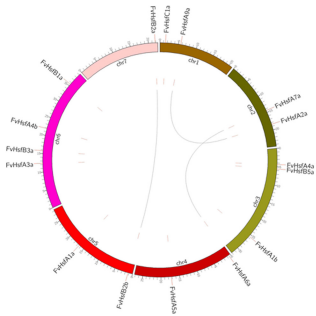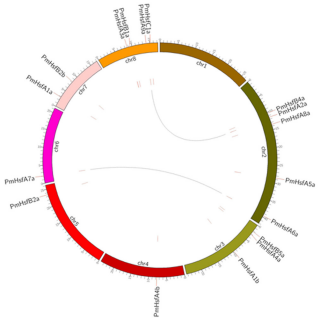

Supplement: 12870_2014_401_MOESM1_ESM.pdf [file 12870_2014_401_MOESM1_ESM.pdf]
